# Supplementary material
Source: MDPI journal article supplement (https://www.mdpi.com/2076-3417/13/3/1728)
Supplement: s1 [file s1]

# TeleFE: A New Tool for the Tele-Assessment of Executive Functions in Children

Carlotta Rivella <sup>1</sup>, Costanza Ruffini <sup>2</sup>, Clara Bombonato <sup>2</sup>, Agnese Capodieci <sup>2</sup>, Andrea Frascari <sup>3</sup>, Gian Marco Marzocchi <sup>4,\*</sup>, Alessandra Mingozzi <sup>4</sup>, Chiara Pecini <sup>2,\*</sup>, Laura Traverso <sup>1</sup>, Maria Carmen Usai <sup>1,\*</sup> and Paola Viterbori <sup>1,\*</sup>

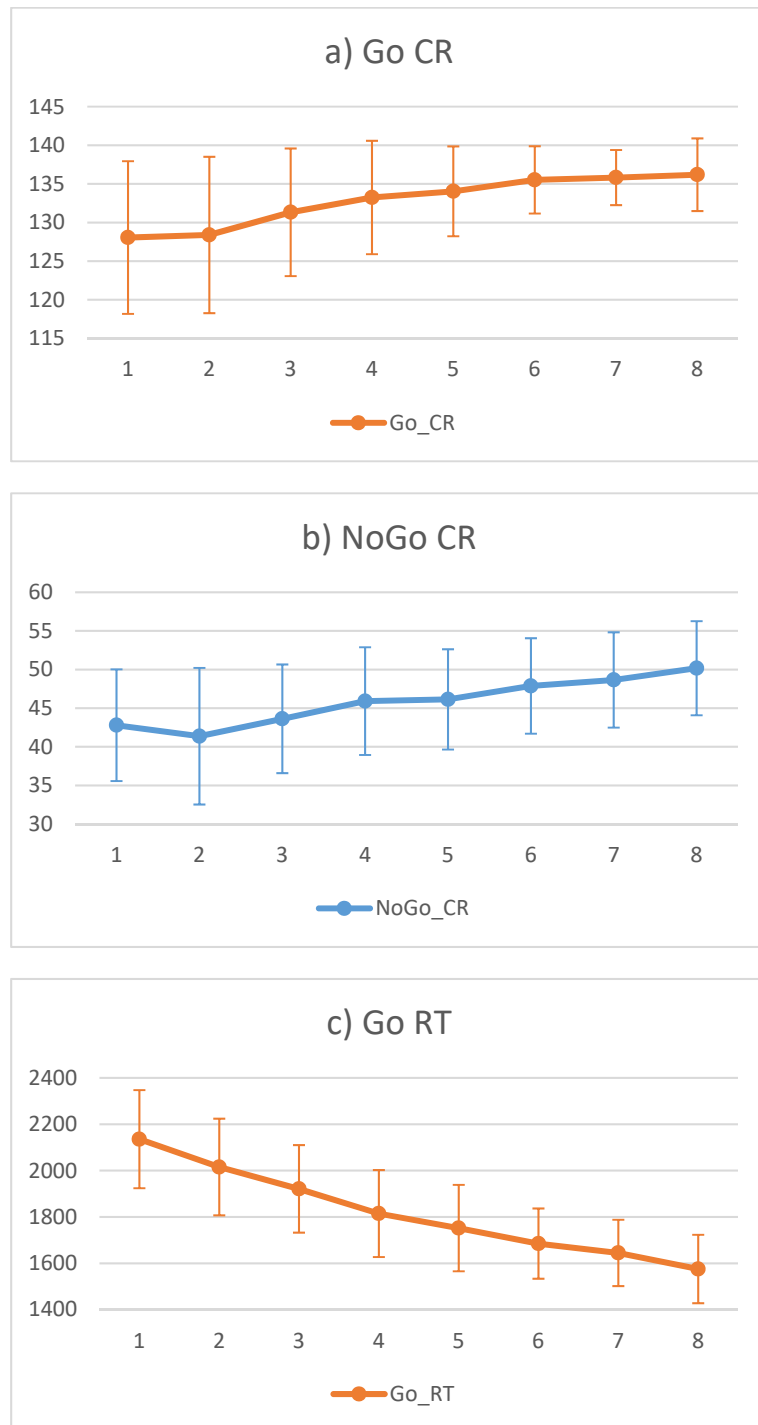

**Figure S1.** Means and standard deviations by class for the Go CR (a), NoGo CR (b) and Go RT measures of the Go/NoGo task.

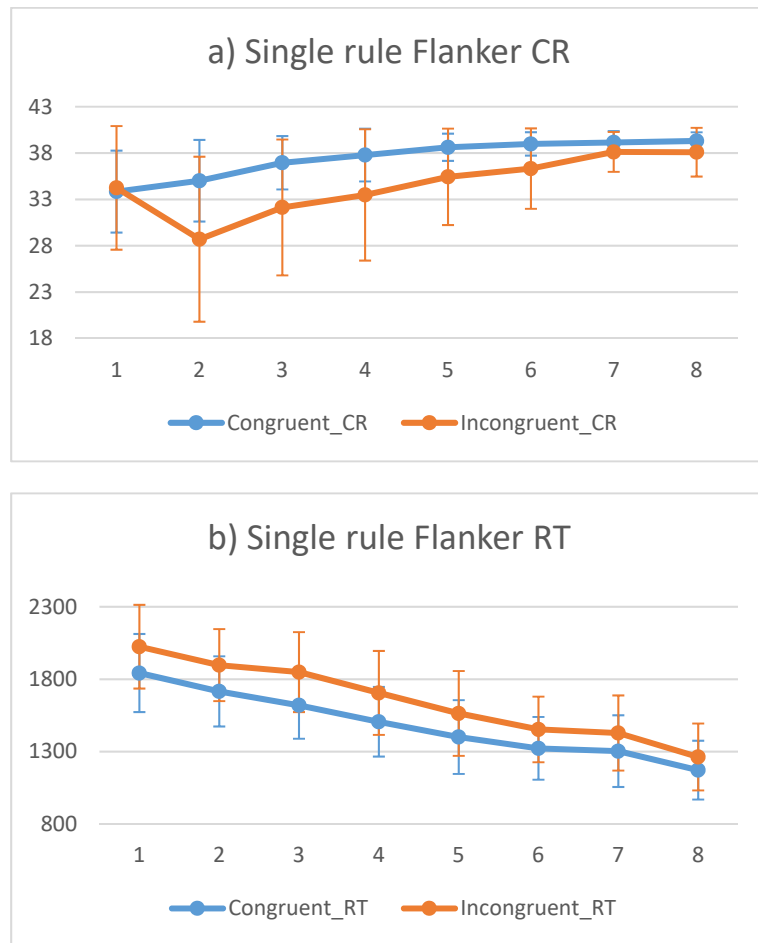

**Figure S2.** Means and standard deviations by class for the CR (a) and RT (b) measures of the Single rule Flanker task.

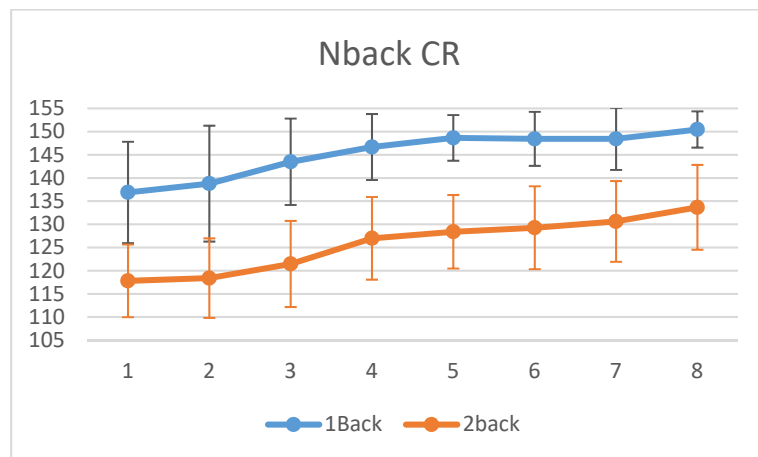

**Figure S3.** Means and standard deviations for each measure of the Nback task by class.

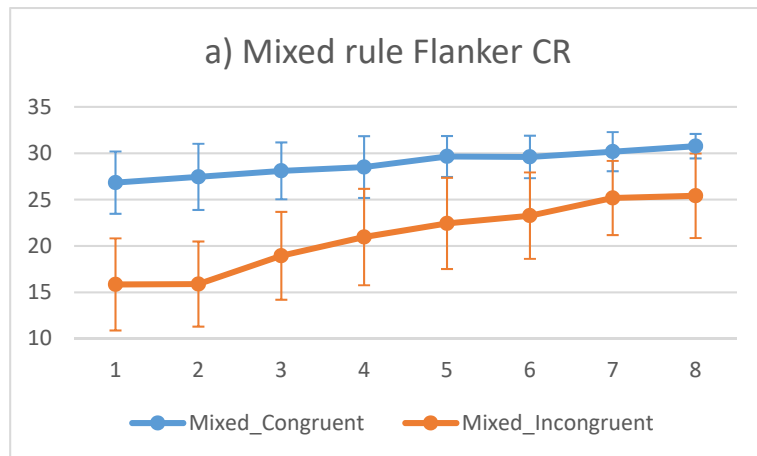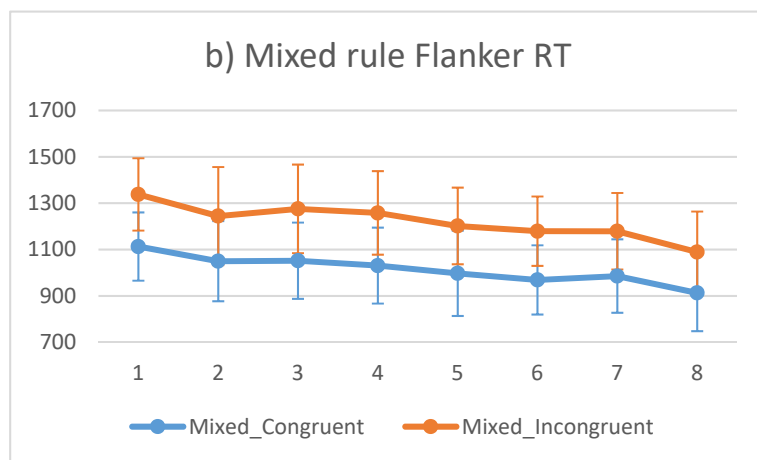

**Figure S4.** Means and standard deviations by class for the CR (a) and RT (b) measures of the Mixed rule Flanker task.

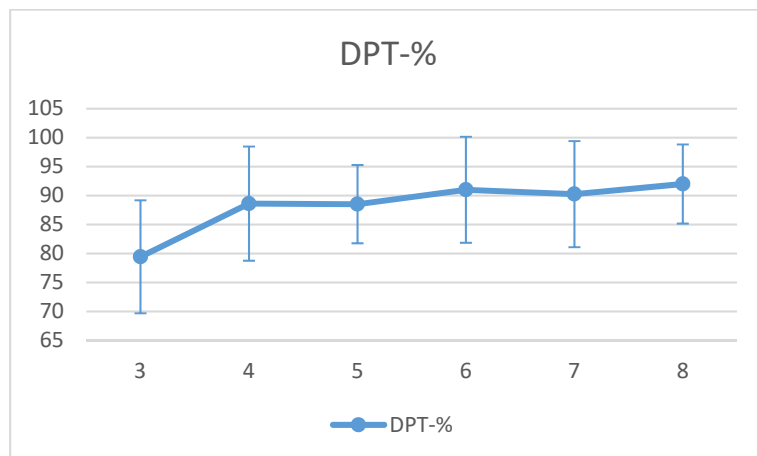

**Figure S5.** Means and standard deviations of the percentage of accuracy on DPT by class.

**Table S1.** Estimated marginal means of accuracy Condition (congruent-incongruent) \* class\* AM for blocks 1 and 2 in the Flanker task.

| AM          | class | Condition   | Mean  | SE   | 95% Confidence Interval |       | Post-hoc between classes (p<.05) |
|-------------|-------|-------------|-------|------|-------------------------|-------|----------------------------------|
|             |       |             |       |      | Lower                   | Upper |                                  |
| In person   | 1     | Congruent   | 34.04 | 1.07 | 31.95                   | 36.14 | <4-8                             |
|             | 2     | Congruent   | 33.83 | 0.82 | 32.22                   | 35.44 | <3-8                             |
|             | 3     | Congruent   | 37.23 | 0.29 | 36.66                   | 37.81 | <5, 7-8                          |
|             | 4     | Congruent   | 38.41 | 0.26 | 37.91                   | 38.92 | >1-2                             |
|             | 5     | Congruent   | 38.85 | 0.26 | 38.35                   | 39.35 | >1-3                             |
|             | 6     | Congruent   | 39.02 | 0.44 | 38.16                   | 39.89 | >1-2                             |
|             | 7     | Congruent   | 39.18 | 0.36 | 38.48                   | 39.87 | >1-3                             |
|             | 8     | Congruent   | 39.40 | 0.39 | 38.63                   | 40.17 | >1-3                             |
|             | 1     | Incongruent | 25.71 | 2.42 | 20.96                   | 30.45 | <3-8                             |
|             | 2     | Incongruent | 34.37 | 1.85 | 30.73                   | 38.01 | <3-8                             |
|             | 3     | Incongruent | 32.73 | 0.66 | 31.43                   | 34.03 | <6-8                             |
|             | 4     | Incongruent | 35.35 | 0.58 | 34.22                   | 36.49 | >1-2                             |
|             | 5     | Incongruent | 35.60 | 0.58 | 34.46                   | 36.73 | >1-2                             |
|             | 6     | Incongruent | 36.45 | 1.00 | 34.49                   | 38.41 | >1-3                             |
|             | 7     | Incongruent | 38.13 | 0.81 | 36.55                   | 39.71 | >1-3                             |
|             | 8     | Incongruent | 38.51 | 0.89 | 36.77                   | 40.26 | >1-3                             |
| At distance | 1     | Congruent   | 33.72 | 0.41 | 32.93                   | 34.52 | <3-8                             |
|             | 2     | Congruent   | 35.03 | 0.22 | 34.59                   | 35.46 | <3-8                             |
|             | 3     | Congruent   | 36.73 | 0.26 | 36.23                   | 37.23 | <6-8                             |
|             | 4     | Congruent   | 37.24 | 0.24 | 36.77                   | 37.70 | >1-2                             |
|             | 5     | Congruent   | 38.23 | 0.37 | 37.50                   | 38.95 | >1-2                             |
|             | 6     | Congruent   | 38.76 | 0.44 | 37.89                   | 39.63 | >1-3                             |
|             | 7     | Congruent   | 39.13 | 0.55 | 38.05                   | 40.21 | >1-3                             |
|             | 8     | Congruent   | 39.16 | 0.55 | 38.08                   | 40.24 | >1-3                             |
|             | 1     | Incongruent | 35.37 | 0.92 | 33.56                   | 37.18 | >2                               |
|             | 2     | Incongruent | 28.25 | 0.51 | 27.26                   | 29.24 | <3-8                             |
|             | 3     | Incongruent | 31.73 | 0.58 | 30.59                   | 32.87 | <5-8                             |
|             | 4     | Incongruent | 32.06 | 0.53 | 31.01                   | 33.11 | <6-8                             |
|             | 5     | Incongruent | 35.77 | 0.84 | 34.12                   | 37.41 | >1-3                             |
|             | 6     | Incongruent | 36.84 | 1.00 | 34.87                   | 38.81 | >1-4                             |
|             | 7     | Incongruent | 38.42 | 1.25 | 35.98                   | 40.87 | >1-4                             |
|             | 8     | Incongruent | 37.79 | 1.25 | 35.34                   | 40.23 | >1-4                             |

**Table S2.** Estimated marginal means of accuracy Condition (congruent-incongruent) \* class\* AM for block 3 in Flanker task.

| AM          | class | Condition   | Mean  | SE   | 95% Confidence Interval |       | Post-hoc between classes (p<.05) |
|-------------|-------|-------------|-------|------|-------------------------|-------|----------------------------------|
|             |       |             |       |      | Lower                   | Upper |                                  |
| In person   | 1     | Congruent   | 25.50 | 1.23 | 23.08                   | 27.92 | <8                               |
|             | 2     | Congruent   | 28.95 | 0.86 | 27.26                   | 30.64 | -                                |
|             | 3     | Congruent   | 28.26 | 0.31 | 27.66                   | 28.87 | <5, 7-8                          |
|             | 4     | Congruent   | 28.75 | 0.26 | 28.24                   | 29.26 | <8                               |
|             | 5     | Congruent   | 29.84 | 0.26 | 29.33                   | 30.35 | >5                               |
|             | 6     | Congruent   | 29.75 | 0.45 | 28.87                   | 30.64 | -                                |
|             | 7     | Congruent   | 30.10 | 0.37 | 29.38                   | 30.82 | >3                               |
|             | 8     | Congruent   | 30.68 | 0.40 | 29.89                   | 31.46 | >1, 3-4                          |
|             | 1     | Incongruent | 20.75 | 2.05 | 16.74                   | 24.76 | -                                |
|             | 2     | Incongruent | 18.83 | 1.43 | 16.03                   | 21.64 | <7-8                             |
|             | 3     | Incongruent | 19.59 | 0.51 | 18.58                   | 20.59 | <5-8                             |
|             | 4     | Incongruent | 21.63 | 0.43 | 20.78                   | 22.48 | <7-8                             |
|             | 5     | Incongruent | 22.66 | 0.43 | 21.82                   | 23.51 | <8                               |
|             | 6     | Incongruent | 23.16 | 0.75 | 21.69                   | 24.63 | >5                               |
|             | 7     | Incongruent | 25.35 | 0.61 | 24.16                   | 26.55 | >2-4                             |
|             | 8     | Incongruent | 25.95 | 0.66 | 24.65                   | 27.25 | >2-4                             |
| At distance | 1     | Congruent   | 27.37 | 0.46 | 26.45                   | 28.28 | <7-8                             |
|             | 2     | Congruent   | 27.32 | 0.24 | 26.85                   | 27.80 | <5-8                             |
|             | 3     | Congruent   | 27.95 | 0.27 | 27.43                   | 28.47 | <8                               |
|             | 4     | Congruent   | 28.31 | 0.24 | 27.84                   | 28.77 | <8                               |
|             | 5     | Congruent   | 29.36 | 0.38 | 28.62                   | 30.10 | >2                               |
|             | 6     | Congruent   | 29.53 | 0.45 | 28.65                   | 30.41 | >2                               |
|             | 7     | Congruent   | 30.29 | 0.56 | 29.19                   | 31.39 | >1-2                             |
|             | 8     | Congruent   | 30.92 | 0.58 | 29.77                   | 32.06 | >1-4                             |
|             | 1     | Incongruent | 15.61 | 0.77 | 14.10                   | 17.13 | <4-8                             |
|             | 2     | Incongruent | 15.68 | 0.40 | 14.89                   | 16.46 | <3-8                             |
|             | 3     | Incongruent | 18.44 | 0.44 | 17.57                   | 19.30 | <5-8                             |
|             | 4     | Incongruent | 20.32 | 0.40 | 19.54                   | 21.10 | <6-8                             |
|             | 5     | Incongruent | 22.28 | 0.62 | 21.06                   | 23.50 | >1-3                             |
|             | 6     | Incongruent | 23.95 | 0.74 | 22.49                   | 25.40 | >1-4                             |
|             | 7     | Incongruent | 25.65 | 0.93 | 23.83                   | 27.48 | >1-4                             |
|             | 8     | Incongruent | 25.17 | 0.97 | 23.27                   | 27.07 | >1-4                             |

| AM | class | Condition | Mean | SE | 95% Confidence Interval |       | Post-hoc between<br>classes (p<.05) |
|----|-------|-----------|------|----|-------------------------|-------|-------------------------------------|
|    |       |           |      |    | Lower                   | Upper |                                     |
